# Supplementary material for: Novel multiple-solvent simultaneous microextraction for flavonoid and anthraquinone preconcentration in traditional Chinese medicine
Source: Royal Society of Chemistry journal article supplement (doi:10.1039/c3ay41565a), 2013-11-28
Supplement: c3ay41565a.pdf [file c3ay41565a.pdf]

R6: Table 1 Recoveries of the nine target analytes in different prescriptions by MSSME coupled with HPLC ( $n=5$ ).

| Sample            | Type           | Analyte      | Content<br>( $\mu\text{g/mL}$ ) | Added<br>standers<br>( $\mu\text{g/mL}$ ) | Average<br>observed<br>content<br>$\bar{X} \pm S$<br>( $\mu\text{g/mL}$ ) | Average<br>Recovery<br>$\bar{R} \pm S$<br>(%) | RSD<br>(%) |
|-------------------|----------------|--------------|---------------------------------|-------------------------------------------|---------------------------------------------------------------------------|-----------------------------------------------|------------|
| <i>H. diffusa</i> | Flavonoids     | Fisetin      | 0.380                           | 0.380                                     | 0.357 $\pm$ 0.011                                                         | 94.0 $\pm$ 2.8                                | 3.0        |
|                   |                | Quercetin    | 0.626                           | 0.630                                     | 0.610 $\pm$ 0.025                                                         | 96.8 $\pm$ 4.0                                | 4.1        |
|                   |                | Isorhamnetin | 0.084                           | 0.078                                     | 0.066 $\pm$ 0.003                                                         | 84.4 $\pm$ 4.3                                | 3.9        |
|                   |                | Kaempferide  | 0.880                           | 0.864                                     | 0.842 $\pm$ 0.041                                                         | 97.4 $\pm$ 4.8                                | 4.9        |
|                   | Anthraquinones | Rhein        | 0.080                           | 0.078                                     | 0.078 $\pm$ 0.008                                                         | 109.5 $\pm$ 9.7                               | 9.6        |
|                   |                | Danthron     | ND                              | 0.098                                     | 0.095 $\pm$ 0.006                                                         | 96.9 $\pm$ 6.3                                | 6.5        |
|                   |                | Emodin       | ND                              | 0.098                                     | 0.097 $\pm$ 0.001                                                         | 99.1 $\pm$ 1.3                                | 1.3        |
|                   |                | Chrysophanol | ND                              | 0.098                                     | 0.097 $\pm$ 0.004                                                         | 99.6 $\pm$ 4.2                                | 4.2        |
|                   |                | Physcion     | ND                              | 0.098                                     | 0.099 $\pm$ 0.005                                                         | 101.5 $\pm$ 5.3                               | 5.3        |
| DHXD              | Flavonoids     | Fisetin      | ND                              | 0.095                                     | 0.096 $\pm$ 0.006                                                         | 101.3 $\pm$ 6.6                               | 6.5        |
|                   |                | Quercetin    | 4.246                           | 4.300                                     | 4.241 $\pm$ 0.117                                                         | 98.7 $\pm$ 2.7                                | 2.7        |
|                   |                | Isorhamnetin | 0.102                           | 0.102                                     | 0.101 $\pm$ 0.007                                                         | 97.8 $\pm$ 6.9                                | 7.1        |
|                   |                | Kaempferide  | ND                              | 0.095                                     | 0.093 $\pm$ 0.006                                                         | 97.8 $\pm$ 6.5                                | 6.7        |
|                   | Anthraquinones | Rhein        | 0.988                           | 0.974                                     | 0.965 $\pm$ 0.066                                                         | 99.1 $\pm$ 6.8                                | 6.8        |
|                   |                | Danthron     | ND                              | 0.070                                     | 0.065 $\pm$ 0.004                                                         | 92.2 $\pm$ 6.0                                | 6.0        |
|                   |                | Emodin       | 0.236                           | 0.237                                     | 0.231 $\pm$ 0.005                                                         | 97.7 $\pm$ 2.3                                | 2.3        |
|                   |                | Chrysophanol | 0.060                           | 0.060                                     | 0.060 $\pm$ 0.001                                                         | 103.9 $\pm$ 9.0                               | 8.7        |
|                   |                | Physcion     | 0.011                           | 0.010                                     | 0.012 $\pm$ 0.001                                                         | 104.7 $\pm$ 7.5                               | 7.2        |

R9: The proof of editing and polishing for language by CrossEdit.

CrossEdit.Com

**CERTIFICATE OF ENGLISH EDITING**

---

To whom it may concern:

This memo is to certify that the paper titled Novel Multiple-Solvent Simultaneous Microextraction for Flavonoid and Anthraquinone Pre-concentration in Traditional Chinese Medicine has been edited for language by CrossEdit, a company dedicated to helping international researchers publish their findings in the best English language journals possible.

Our International paper editing service is performed by a subject expert editor and approved by a senior editor. All our editors are native English speakers.

The certificate is being issued upon the request of the client. If you have any questions, please contact [service@crossedit.com](mailto:service@crossedit.com)

Signature of the editor representative:



---

Martin J. Booth
